# Supplementary material for: A Transcriptome Array-Based Approach to Link SGLT-2 and Intrarenal Complement C5 Synthesis in Diabetic Nephropathy
Source: MDPI journal article supplement (doi:10.3390/ijms242317066), 2023-12-02
Supplement: s1 [file s1]

# **A transcriptome array-based approach to link SGLT-2 and intrarenal complement C5 synthesis in diabetic nephropathy**

## **Supplemental Material**

Peter Korsten<sup>1</sup>, Björn Tampe<sup>1,\*</sup>

*<sup>1</sup>Department of Nephrology and Rheumatology, University Medical Center Göttingen,  
Göttingen, Germany*

*\*Corresponding author*

### **Corresponding author:**

Björn Tampe, MD

Department of Nephrology and Rheumatology

University Medical Center Göttingen, Germany

Telephone number: +49 551 39 10575

Email: [bjoern.tampe@med.uni-goettingen.de](mailto:bjoern.tampe@med.uni-goettingen.de)

**Table S1. Included samples extracted from Nephroseq for tubulointerstitial *SLC5A2* mRNA expression in diabetic nephropathy.**

| Sample name                     | Patient ID | Group                | log <sub>2</sub> <i>SLC5A2</i> |
|---------------------------------|------------|----------------------|--------------------------------|
| H1Tub.HGU133A.DNNULL.DN1        | DN1        | Diabetic Nephropathy | 3,09435                        |
| H1Tub.HGU133A.DNNULL.DN10       | DN10       | Diabetic Nephropathy | 2,63963                        |
| H1Tub.HGU133A.DNNULL.DN11       | DN11       | Diabetic Nephropathy | 3,81952                        |
| H1Tub.HGU133A.DNNULL.DN2        | DN2        | Diabetic Nephropathy | 2,70262                        |
| H1Tub.HGU133A.DNNULL.DN3        | DN3        | Diabetic Nephropathy | 1,7074                         |
| H1Tub.HGU133A.DNNULL.DN5        | DN5        | Diabetic Nephropathy | 2,50726                        |
| H1Tub.HGU133A.DNNULL.DN6        | DN6        | Diabetic Nephropathy | 2,55282                        |
| H1Tub.HGU133A.DNNULL.DN7        | DN7        | Diabetic Nephropathy | 3,02197                        |
| H1Tub.HGU133A.DNNULL.DN8        | DN8        | Diabetic Nephropathy | 3,49134                        |
| H1Tub.HGU133A.DNNULL.DN9        | DN9        | Diabetic Nephropathy | 1,99601                        |
| H7Tub.HGU133Plus2.DN1101.DN1101 | DN1101     | Diabetic Nephropathy | 3,70394                        |
| H7Tub.HGU133Plus2.DN1108.DN1108 | DN1108     | Diabetic Nephropathy | 2,05049                        |
| H7Tub.HGU133Plus2.DN1110.DN1110 | DN1110     | Diabetic Nephropathy | 1,72055                        |
| H7Tub.HGU133Plus2.DN1114.DN1114 | DN1114     | Diabetic Nephropathy | 3,37274                        |
| H7Tub.HGU133Plus2.DN1132.DN1132 | DN1132     | Diabetic Nephropathy | 3,59363                        |
| H7Tub.HGU133Plus2.DN1133.DN1133 | DN1133     | Diabetic Nephropathy | 2,99347                        |
| H7Tub.HGU133Plus2.DN1139.DN1139 | DN1139     | Diabetic Nephropathy | 2,41642                        |

**Table S2. Included samples extracted from Nephroseq for glomerular *SLC5A2* mRNA expression in diabetic nephropathy.**

| Sample name                    | Patient ID | Group                | log <sub>2</sub> <i>SLC5A2</i> |
|--------------------------------|------------|----------------------|--------------------------------|
| H1Glom.HGU133A.DNNULL.DN1      | DN1        | Diabetic Nephropathy | 0,60626                        |
| H1Glom.HGU133A.DNNULL.DN10     | DN10       | Diabetic Nephropathy | 0,65666                        |
| H1Glom.HGU133A.DNNULL.DN2      | DN2        | Diabetic Nephropathy | 0,48519                        |
| H1Glom.HGU133A.DNNULL.DN5      | DN5        | Diabetic Nephropathy | 1,26904                        |
| H1Glom.HGU133A.DNNULL.DN8      | DN8        | Diabetic Nephropathy | 1,45295                        |
| H7Glom.HGU133Plus2.DN901.DN901 | DN901      | Diabetic Nephropathy | 0,5905                         |
| H7Glom.HGU133Plus2.DN910.DN910 | DN910      | Diabetic Nephropathy | 0,87945                        |
| H7Glom.HGU133Plus2.DN914.DN914 | DN914      | Diabetic Nephropathy | 0,04608                        |
| H7Glom.HGU133Plus2.DN916.DN916 | DN916      | Diabetic Nephropathy | 2,7741                         |
| H7Glom.HGU133Plus2.DN932.DN932 | DN932      | Diabetic Nephropathy | 0,71334                        |
| H7Glom.HGU133Plus2.DN941.DN941 | DN941      | Diabetic Nephropathy | 0,07602                        |
| H7Glom.HGU133Plus2.DN947.DN947 | DN947      | Diabetic Nephropathy | 1,59228                        |

| <b>Table S3. Pathways correlated with tubulointerstitial <i>SLC5A2</i> mRNA expression in diabetic nephropathy.</b> |                       |                       |                       |                   |                     |                        |                        |                       |                |
|---------------------------------------------------------------------------------------------------------------------|-----------------------|-----------------------|-----------------------|-------------------|---------------------|------------------------|------------------------|-----------------------|----------------|
| <b>Pathway</b>                                                                                                      | <b>Entities found</b> | <b>Entities total</b> | <b>Entities ratio</b> | <b>Entities p</b> | <b>Entities FDR</b> | <b>Reactions found</b> | <b>Reactions total</b> | <b>Reations ratio</b> | <b>Species</b> |
| Metallothioneins bind metals                                                                                        | 6                     | 16                    | 0.001                 | 6.13E-7           | 5.39E-4             | 13                     | 27                     | 0.002                 | Homo sapiens   |
| Response to metal ions                                                                                              | 6                     | 21                    | 0.001                 | 2.91E-6           | 1.28E-3             | 13                     | 31                     | 0.002                 | Homo sapiens   |
| Metabolism                                                                                                          | 98                    | 3,644                 | 0.24                  | 1.03E-5           | 3.02E-3             | 256                    | 2,268                  | 0.16                  | Homo sapiens   |
| NR1H3 & NR1H2 regulate gene expression linked to                                                                    | 8                     | 66                    | 0.004                 | 3.36E-5           | 7.36E-3             | 34                     | 40                     |                       | Homo sapiens   |
| Metabolism of carbohydrates                                                                                         | 19                    | 459                   | 0.03                  | 8.27E-4           | 1.21E-1             | 28                     | 241                    | 0.017                 | Homo sapiens   |
| Proline catabolism                                                                                                  | 3                     | 14                    | 0.001                 | 2.23E-3           | 2.25E-1             | 3                      | 4                      | 0                     | Homo sapiens   |
| Chylomicron assembly                                                                                                | 3                     | 14                    | 0.001                 | 2.23E-3           | 2.25E-1             | 1                      | 5                      | 0                     | Homo sapiens   |
| Glyoxylate metabolism and glycine degradation                                                                       | 6                     | 73                    | 0.005                 | 2.35E-3           | 2.25E-1             | 6                      | 23                     | 0.002                 | Homo sapiens   |
| Biological oxidations                                                                                               | 20                    | 551                   | 0.036                 | 2.83E-3           | 2.25E-1             | 26                     | 192                    | 0.014                 | Homo sapiens   |
| Plasma lipoprotein assembly, remodeling, and                                                                        | 7                     | 102                   | 0.007                 | 2.85E-3           | 2.25E-1             | 14                     | 86                     | 0.006                 | Homo sapiens   |
| Phase I - Functionalization of compounds                                                                            | 13                    | 301                   | 0.02                  | 3.77E-3           | 2.38E-1             | 19                     | 102                    | 0.007                 | Homo sapiens   |
| Plasma lipoprotein remodeling                                                                                       | 5                     | 56                    | 0.004                 | 3.81E-3           | 2.38E-1             | 7                      | 31                     | 0.002                 | Homo sapiens   |
| Chylomicron remodeling                                                                                              | 3                     | 17                    | 0.001                 | 3.84E-3           | 2.38E-1             | 3                      | 3                      | 0                     | Homo sapiens   |
| Keratan sulfate biosynthesis                                                                                        | 4                     | 36                    | 0.002                 | 4.44E-3           | 2.58E-1             | 5                      | 9                      | 0.001                 | Homo sapiens   |
| Nuclear Receptor transcription pathway                                                                              | 6                     | 86                    | 0.006                 | 5.19E-3           | 2.8E-1              | 2                      | 2                      | 0                     | Homo sapiens   |
| HDL remodeling                                                                                                      | 3                     | 24                    | 0.002                 | 9.86E-3           | 4.6E-1              | 1                      | 13                     | 0.001                 | Homo sapiens   |

| <b>Table S4. Pathways correlated with tubulointerstitial C5 mRNA expression in diabetic nephropathy.</b> |                       |                       |                       |                   |                     |                        |                        |                       |                |
|----------------------------------------------------------------------------------------------------------|-----------------------|-----------------------|-----------------------|-------------------|---------------------|------------------------|------------------------|-----------------------|----------------|
| <b>Pathway</b>                                                                                           | <b>Entities found</b> | <b>Entities total</b> | <b>Entities ratio</b> | <b>Entities p</b> | <b>Entities FDR</b> | <b>Reactions found</b> | <b>Reactions total</b> | <b>Reations ratio</b> | <b>Species</b> |
| Metabolism                                                                                               | 276                   | 3,644                 | 0.24                  | 1.11E-16          | 1.42E-13            | 538                    | 2,268                  | 0.16                  | Homo sapiens   |
| Protein localization                                                                                     | 34                    | 170                   | 0.011                 | 9.43E-12          | 6.02E-9             | 47                     | 53                     | 0.004                 | Homo sapiens   |
| Peroxisomal protein import                                                                               | 18                    | 67                    | 0.004                 | 9.74E-9           | 4.14E-6             | 22                     | 26                     | 0.002                 | Homo sapiens   |
| Metabolism of amino acids and derivatives                                                                | 63                    | 667                   | 0.044                 | 5.29E-7           | 1.63E-4             | 80                     | 285                    | 0.02                  | Homo sapiens   |
| Aspirin ADME                                                                                             | 17                    | 80                    | 0.005                 | 6.4E-7            | 1.63E-4             | 10                     | 26                     | 0.002                 | Homo sapiens   |
| Transport of small molecules                                                                             | 81                    | 969                   | 0.064                 | 1.54E-6           | 3.26E-4             | 99                     | 454                    | 0.032                 | Homo sapiens   |
| Mitochondrial Fatty Acid Beta-Oxidation                                                                  | 17                    | 105                   | 0.007                 | 2.16E-5           | 3.94E-3             | 35                     | 47                     | 0.003                 | Homo sapiens   |
| Metabolism of vitamins and cofactors                                                                     | 38                    | 382                   | 0.025                 | 3.41E-5           | 4.81E-3             | 61                     | 205                    | 0.014                 | Homo sapiens   |
| Drug ADME                                                                                                | 27                    | 239                   | 0.016                 | 6.14E-5           | 7.12E-3             | 28                     | 121                    | 0.009                 | Homo sapiens   |
| PPARA activates gene expression                                                                          | 21                    | 175                   | 0.012                 | 1.77E-4           | 1.73E-2             | 15                     | 41                     | 0.003                 | Homo sapiens   |
| Regulation of lipid metabolism by PPARalpha                                                              | 21                    | 177                   | 0.012                 | 2.05E-4           | 1.87E-2             | 18                     | 45                     | 0.003                 | Homo sapiens   |
| Iron uptake and transport                                                                                | 13                    | 83                    | 0.005                 | 2.66E-4           | 2.26E-2             | 6                      | 34                     | 0.002                 | Homo sapiens   |
| The citric acid (TCA) cycle and respiratory electron                                                     | 25                    | 238                   | 0.016                 | 3.33E-4           | 2.63E-2             | 38                     | 67                     | 0.005                 | Homo sapiens   |
| Fatty acid metabolism                                                                                    | 38                    | 431                   | 0.028                 | 3.72E-4           | 2.63E-2             | 64                     | 220                    | 0.015                 | Homo sapiens   |
| Biotin transport and metabolism                                                                          | 6                     | 19                    | 0.001                 | 3.75E-4           | 2.63E-2             | 7                      | 13                     | 0.001                 | Homo sapiens   |
| SLC-mediated transmembrane transport                                                                     | 37                    | 418                   | 0.028                 | 4.12E-4           | 2.76E-2             | 38                     | 194                    | 0.014                 | Homo sapiens   |
| Pyruvate metabolism and Citric Acid (TCA) cycle                                                          | 14                    | 100                   | 0.007                 | 4.76E-4           | 3.00E-02            | 17                     | 36                     | 0.003                 | Homo sapiens   |
| Biological oxidations                                                                                    | 45                    | 551                   | 0.036                 | 5.63E-4           | 3.38E-2             | 70                     | 192                    | 0.014                 | Homo sapiens   |
| Glucuronidation                                                                                          | 10                    | 58                    | 0.004                 | 6.43E-4           | 3.67E-2             | 8                      | 11                     | 0.001                 | Homo sapiens   |
| Mitochondrial protein import                                                                             | 11                    | 69                    | 0.005                 | 6.67E-4           | 3.67E-2             | 12                     | 14                     | 0.001                 | Homo sapiens   |
